# Supplementary material for: Development of a Chimeric Porcine Reproductive and Respiratory Syndrome Virus (PRRSV)-2 Vaccine Candidate Expressing Hypo-Glycosylated Glycoprotein-5 Ectodomain of Korean Lineage-1 Strain
Source: MDPI journal article supplement (doi:10.3390/vetsci9040165), 2022-03-29
Supplement: s1 [file s1]

**Supplementary Table S1. Results of the animal experiment.** Body weight (BW), sample-to-positive (S/P) values, and serum virus neutralization (SVN) antibody titer of the vaccinated group (group A, Vac) and negative control (group B, NC) at different weeks post-vaccination (wpv). The cutoff values of the ELISA and SVN test are 0.40 and 2.00, respectively.

| Groups                         | Pigs no. | BW    |       | S/P values |       |       | SVN antibody titer |       |
|--------------------------------|----------|-------|-------|------------|-------|-------|--------------------|-------|
|                                |          | 8 wpv | 0 wpv | 4 wpv      | 6 wpv | 8 wpv | 0 wpv              | 8 wpv |
| <b>Group A</b><br><b>(Vac)</b> | 1        | 35.0  | 0.86  | 1.32       | 1.03  | 1.98  | 2.00               | 6.00  |
|                                | 2        | 27.5  | 1.76  | 0.99       | 0.95  | 1.46  | 4.00               | 5.00  |
|                                | 3        | 33.0  | 1.39  | 1.34       | 2.23  | 1.57  | 3.00               | 8.50  |
|                                | 4        | 31.5  | 0.36  | 2.13       | 2.00  | 1.72  | 0.00               | 5.75  |
|                                | 5        | 24.0  | 1.13  | 1.76       | 1.88  | 2.04  | 4.00               | 5.00  |
|                                | 6        | 35.5  | 1.47  | 1.69       | 2.00  | 1.02  | 3.00               | 6.00  |
|                                | 7        | 25.0  | 0.48  | 1.37       | 1.34  | 1.42  | 0.00               | 2.00  |
|                                | 8        | 26.0  | 0.67  | 1.82       | 1.47  | 1.97  | 3.00               | 0.00  |
|                                | 9        | 26.5  | 0.11  | 1.54       | 1.49  | 2.27  | 0.00               | 2.75  |
|                                | 10       | 28.0  | 0.66  | 1.53       | 2.13  | 2.02  | 0.00               | 3.00  |
| <b>Group B</b><br><b>(NC)</b>  | 1        | 31.5  | 1.96  | 1.43       | 1.80  | 1.38  | 3.00               | 2.00  |
|                                | 2        | 34.0  | 0.30  | 0.01       | 0.02  | 0.01  | 0.00               | 0.00  |
|                                | 3        | 24.5  | 0.75  | 2.22       | 2.13  | 1.41  | 4.00               | 3.00  |
|                                | 4        | 24.0  | 1.42  | 1.62       | 1.95  | 1.95  | 3.00               | 4.00  |
|                                | 5        | 23.0  | 1.94  | 1.81       | 1.01  | 1.87  | 2.50               | 3.00  |
